# Supplementary material for: Mechanisms of surface solar irradiance variability under broken clouds
Source: Copernicus journal article supplement (doi:10.5194/egusphere-2024-2396), 2024-08-20
Supplement: Supplementary file [file egusphere-2024-2396-AC3-supplement.pdf]

## Philip Gregor (referee #2)

This paper focuses on surface solar irradiance (SSI) variability in broken cloud situations and investigates mechanism for SSI enhancements in presence of broken clouds. Therefore, 3D radiative transfer simulations for idealized and non-idealized clouds were performed and resulting irradiance fields are systematically evaluated to explore the involved mechanisms.

This paper is generally well written, presents new insights and can be a valuable basis for further studies in this field. I believe it is suited for publication after addressing my comments below and major changes to the introduction.

Thank you for your helpful and constructive comments, of which you had many. Some general themes were already addressed in an earlier part of this response, but please find our replies to each of your comments below.

### **General comments**

L. 15-30: The introduction is currently not matching the overall quality of this paper and seems to be suitable only if placed within a larger academic work ("thesis", L.17). For this article, I would suggest a general introduction to the overall topic including its importance, placing this study in the context of prior work and describing the scope and additional value of this study instead of starting with a description of the content of the introduction chapter.

Agreed, the original introduction was much too concise and not introductory. We have thoroughly revised the introduction and modified the first sections to yours and the other reviewer's comments. I hope you will now find it better introduces the topic, motivation, knowledge gaps, and overall structure of the study.

As for the word "thesis", this was an awkward oversight, and indeed originated from writing my thesis introduction and outlook chapters in parallel to this study.

While chapter 1.2 gives some references to previous work, it also introduces a concept for separating relevant mechanisms and gives fundamental definitions for this work. I would therefore suggest to move this to a separate chapter outside the introduction.

Agreed, the lines between topic introduction, existing knowledge, and new knowledge were blurry at times. We have paid attention to this whilst revising the first sections of this manuscript. Section 1.2 has been moved to a separate section.

Overall, the language and figure descriptions seem unprecise in multiple occasions. Some important information and details for reproducibility are missing. Although the provided source code and data could give some hints, I think the quality of the paper would profit from some thorough revision. In the specific comments below, I give examples, where in my opinion improvements could be easily adapted.

Thank you for pointing this out. I think I have leaned too much on model description references and open data regarding reproducibility. The details are in replies to your specific comments, but overall, the experimental setup, model description, various figure captions, and textual comments to experiment details in the results section have been revised and are now more complete.

I encountered problems opening the "model\_data.zip" provided through your zenodo data publication on a linux computer. Please double-check the file is usable.

I have the same issue. The .zip is apparently a .tar ("tar -xvf model\_data.zip" gives you a collection of .zip files with each experiment), but it contains at least one corrupted .zip. I am not sure what happened, as my local copy is fine. I have updated the open data version with new model data and updated processing scripts, and I have verified that it works.

Irradiances obtained with MCRT are subject to uncertainty. While this uncertainty might not be crucial for the results presented in this study, at least an order of magnitude should be mentioned in appropriate places of this paper. This could at least be a general upper limit desired for all experiments or experiment specific. The uncertainty/noise is well visible in ,e.g., Figs. 8, 9 and following.

I think that presenting uncertainties of the MCRT based on statistical noise will not add relevant information. We have run all simulations to the point where the mean signal dominates the noise, as is visible in all figures. Of course, there are other sources of uncertainty, which we now try to demonstrate more transparently in a set of sensitivity experiments (phase function, droplet number concentration) and a better description of the methodology.

### **Specific comments**

L. 3: "surface solar irradiance extremes": This work and the mechanisms are about maxima, minima are also extremal but not discussed. While I do not see this as critical in this occasion, please think about more precise wording in general. This would apply also the the title, as "variability" includes a lot more than the irradiance enhancement mainly discussed in this paper.

Agreed on that the wording is sometimes used incorrectly. 'extreme' fits when discussing 'SSI variability', but not when referring to 'SSI' alone, as you point out. I have changed 'extremes' to 'variations' in L. 3.

Regarding 'variability', it is the best fitting word I have found to describe what I believe it is we are researching here. In original introduction (section 1.1), I define what I mean with 'variability', and while IE is a key part of this definition it not the only thing we discuss.

L. 4: Missing word after "and" (low?)

"And" should not be there, this is now fixed.

L. 29: Missing mention and description of Section 4 and 5

Fixed.

Fig. 1: Missing legend for color coding of lines

Fixed and clarified figure caption.

L. 48: Is there any previous work or citable resource, on increased cloud cover fraction of altocumulus compared to shallow cumulus? If yes, please include a reference else I do comply with this feeling and see that this is more of a definition for this work, but you may think about a less general formulation.

It was more an observation of our own, but we introduced it without any reference, nor is it a new insight. We have reformulated this and included a reference to a more general description of altocumulus.

L. 75: "clear-sky to overcast conditions" seems misinterpretable to me, potentially including all conditions in between. I would suggest 'the transition from clear-sky to overcast conditions' instead

Agreed, fixed.

L.76: "Example[s]"

Fixed.

Fig. 2: Colorbar label is "Normalized" while "normalised" is used in the caption and mostly throughout the document.

Fixed.

Fig. 2: The axes do not really match what the figure describes, as the independent patches do not have an obvious spatial relation on x- and y-axis. I would suggest just scales in "cross-wind" and "along-wind" direction for more clarity.

I am not sure if I agree that they have no obvious spatial relation on an x- and y-axis if the directions are defined as along-wind and cross-wind. But the bigger challenge was to concisely show a collection of spatial patterns that are, indeed, independent. In the end I think I agree on the relabeling suggestion, but I've also moved the axes spines outward which to me gives a slightly better impression regarding the independence of patches.

L. 88: Probable typo: "I[n] all cases"

Yes, fixed.

L. 94: The "region" of optical thickness seems misinterpretable to me as a spatial description, as area and value range are important throughout this study. Possibly, using 'range' instead could clarify this a bit more.

Agreed, fixed.

L. 102: "optically thin area": "area" (L. 97) refers to surface area and "parts of" (L. 100) as well as "sections" (L. 101) refer to spatial distribution of optical thickness. More stringent nomenclature could benefit readability a little bit here.

I have rephrased multiple parts of the paragraph to clearly separate (Earth's) surface "area" underneath clouds and optically thin cloud "area". I expect this has improved readability.

L. 105: What is the "upper limit of optical thickness" referring to here?

Optically thick or 'opaque' clouds, but this was phrased poorly. I have reformulated the sentence.

L. 107: "creat[ing]"

Fixed.

L. 150: As longwave is not used for this study to my understanding, the mention of the "128 set for longwave" seems irrelevant. I suggest either not mentioning it, in case you did not use and potentially also did not compute it or explaining why you needed to compute it, as neglecting it would have saved significant amount of computational effort.

I have taken out the longwave g-point comment.

L. 181-184: The text should mention that the cloud is only populating half of the domain. Information like domain size and horizontal resolution is also missing in the text. Also information on solar azimuth would clarify the setup. There is no information on atmospheric properties apart from clouds. For clear-sky SSI values (which then could be mentioned for example here) and reproducibility, this is a necessary information. Also the (periodic?) boundary conditions of the MCRT are only mentioned later on for the Cb-case.

The information on experimental setup is not organised clearly enough, and some important information is missing. This also hid some decisions and logic of certain setups. To address this issue:

- I now mention that stratus covers half the domain, and why it is effectively periodic (and infinite) in the y-direction
- I mention and motivate the domain size and resolution choices
- I mention when atmospheric profiles are the same between cases, or when they differ. Details of which specific profile it is are less important, and the profile choices are fairly arbitrary. The important part is that moisture profiles affect clear-sky irradiance, and while most presented data is normalized w.r.t. clear-sky, it'll help understand subtle differences in absolute values.
- I changed figure 4b so it plots the 100 m radius version of the cloud gap that is used in the analyses of section 4.2 (Figure 9). Originally, I showed a 500 m radius version, which matched the radius of the plotted cloud disk, but that deviates too much from a small gap as used in Yordanov's work (35 m diameter).
- The simulation tools section (2.1) now mentions the periodic boundary conditions of the ray tracer and that we use a single trace gas profile for all simulation.
- Clear-sky SSI varies between experiments due to differences in atmospheric moisture profiles (notwithstanding the albedo and zenith angle effects), this is clarified in section 2.1, 3.1.1

L. 185: Fig. 4 suggests the domain is 12.8km x 12.8km for stratus, but 6.4km x 6.4km for cloud gap. Is this "the same configuration" and only an excerpt shown or do the domain sizes differ? Please clarify.

[See previous comment.](#)

L. 189: Two times "manually": I suggest deleting the later occurrence

[Fixed.](#)

L. 196-201: As later use of this case suggests, the domain size here is not 12.8km x 12.8km (or 6.4km x 6.4km), but larger to isolate the towering cumulus. Please mention the actual

domain size also here. While it is later on (Section 4.5) noted, that the optical thickness is ensured to be large enough, a thorough documentation of your scaling of optical thickness with increasing cloud depth is missing and should be added, for example here.

These are all good points and are now discussed in the case description.

L. 208-209: Repetitive use of "altocumulus", e.g., the second occurrence could be replaced by 'This'.

I have left it unchanged for clarity.

Fig. 6: As cloud depth is later on (e.g. Fig. 13) used to distinguish cases, it would be nice if this would be given for the displayed snapshots for a better association.

Nice suggestions, I have added the cloud depth for the snapshots. Estimating from just the y-axis is indeed not easy.

L. 244: I am unsure whether there should be a second "in" in "for the scattering regime we are [in] in terms of mechanism".

Me neither. I have rephrased the sentence to avoid the awkward double 'in'.

Fig. 9: The domain cross-section used for this plot could be indicated in Fig. 4 to get a feeling of the averaged region in y-direction, especially in the checkerboard case. This would also give a hint on sun direction there. Otherwise "(part of)" (Fig. 9, caption L. 2) is a very vague definition.

Indeed, this was not well explained. I have added a magenta shading to Figure 5d showing the same selection as was used for subsetting and averaging the data in Figure 9cfi, and explained this in the captions.

Fig. 9: While theoretically reconstructable from Norm. SSI (-), AE ( $W/m^2$ ) and AE as % of IE for the reader, it would be helpful for the reader to have clear-sky SSI (dir/dif/tot) values given at least for this figure or more in general in the text.

Clear-sky SSI is a function of atmospheric profile, surface albedo, and solar zenith angle. There will be too many different numbers to give, and normalisation solves this issue. But I agree that there should be some mention of absolute clear-sky SSI to help the reader, so I have added them for the total SSI in the middle row of Figure 9 for each albedo, case, and zenith angle.

Fig. 9 g-i: The extremal values on the shadow borders are a striking feature and should at least briefly assessed in the text. Also, there is no explanation of the grey regions here.

These happen due to IE approaching zero and switching sign from sunlit to shaded areas. This leads to physically meaningless artefacts at the transition and negative values for IE in shaded areas. The gray mask was meant to mask the shaded areas to avoid having to discuss what negative values of “% of IE” mean, but I forgot to explain the masking itself. This is now fixed. The colormap is changed to also make it clearer that the middle and bottom rows are different units.

For clarity, a negative “% of IE” is due to IE being negative in cloud shadows. It is then an irradiance reduction instead of enhancement, and you can still calculate what % of the negative IE is accounted for by increase in irradiance due to albedo.

Fig. 9 i: In the case of sun zenith angle  $SZA=30^\circ$  the gray shaded area including the border grid boxes do have an x-extent of about 2x the extent of the valid data area excluding the border grid boxes with extremal values. To my understanding, of the text, the cloud disks are 500m in diameter with a maximum distance of 150m in between (L. 193-195). This would suggest a ratio of  $> 3:1$ . I guess this is due to the selected and averaged y-axis range, but this needs more explanation.

It is indeed due to the selected y-axis range. Please refer to the revised figure 4 which better shows how data was selected. My comments on ‘maximum’ 150 m spacing in between are wrong in hindsight, but it may have been a typo: the spacing is 250 m at most. I have clarified the text.

L. 304-310: A full description of the setup would in my opinion include albedo and SZA in the text, not just in Fig. 10

Fair enough, I have more completely described the setup in text now.

Fig. 10 and Section 4.4.1:

Is the SSI summed/averaged over the entire domain (almost) constant for all cloud altitudes and therefore the power only redistributed or is there a significant difference in surface solar power based on cloud altitude? To me, this would be a nice additional information and support the previous explanation of checkerboard case SSI.

It's nearly constant. Domain averaged SSI changes at most 0.05% (highest vs. lowest cloud, for the 1000 m case). I added this information to the text.

L. 326: Can omit the "in" in "very small [in] for the simulated altocumulus"

Thanks, fixed.

L. 336: "There are two exceptions where forward escape still occurs": In a statistical sense, individual photons/rays can always be scattered only once or twice and therefore there is

always some fraction of forward escape. While the meaning is fully understandable in this context, please consider rephrasing to avoid the impression of exclusivity of the mechanisms. I would suggest replacing "occurs" by 'plays a significant role' or 'contributes significantly'.

Fixed.

Fig. 13 caption:

Neither a nor b do directly show SSI patterns as indicated by the caption. Please make the caption, especially the first sentence, more precise.

This was not well-captioned, indeed. A pattern can (in my view) still be 1D, or a line, so I keep the word 'pattern' for 13a. But it's not an SSI pattern, rather it's an IE pattern, technically.

Fig. 13 a: Are 17.2 and 18.4 ordered on purpose like this in the legend?

It's where time and cloud depth de-couple: 18.4 km is an overshooting top, 17.2 km is where the updraft settles in a later time step. The legend is ordered as function of time. It's why the last scatter points on each line in Figure 13c also decrease in cloud depth (but increase in diffuse enhancement, as the anvil is spreading out). I have added that the cloud top decreases in the last time step for clarity in the caption.

L. 371: There is still a maximum in IE in these cases, it is just spatially shifted and/or decreased. Please rephrase "disappearance" or specify the "peak irradiance enhancement" you mean more in detail.

I now explicitly refer to the 'narrow peak near the cloud edge' as opposed to any local IE maximum.

L. 377: For example 'hinder' or 'obstruct' would describe the process more factual than "takes over the side escape mechanism". At the moment this sentence does not reflect the actual process to me.

Agreed. 'Hinders' fits well here, I have changed the text.

Fig. 14: Cb cases were before referenced by LES time or cloud depth. For better orientation, it would be helpful to get this information here as well.

Added the timestamps to the subplots.

Fig 15 caption, L.3:

"The [S]un"



Fixed.

L. 399-400: The regions meant here are the ones away from 'cloud shadows' and not from "clouds", I suggest? Please consider rephrasing.

I don't quite follow. I am referring in the text to regions on the sunlit side of clouds that are not directly shaded by other clouds.

L. 409: "sunlit cloud base" sounds to me only possible with  $SZA > 90^\circ$ . Please clarify.

I changed it to 'cloud base edge'. Cloud base to me is not simply the underside of a cloud, but includes some finite thickness and therefore also a side, but hopefully this new phrasing clarifies my meaning.

L. 427: Also for clouds with optical depth  $> 6$ , a (small) fraction of light is scattered only once or twice. Therefore I suggest adding "irradiance is [predominantly] scattered uniformly downward".

Changed, also changed 'uniformly' to 'diffusely' (as per your next comment).

L. 427: To my knowledge, the downward radiance distribution underneath optically thick clouds is not "uniform". Please clarify.

This can be looked up, e.g., in theory and simulation in Sobolev (2017), Grant et al. (1995), in measurements in Nagata et al. (1997) or simply using a 1D-RT calculation with an optically thick cloud.

Changed to 'diffusely'. I was using 'uniform' in the context of the idealised clouds that were uniform by design, but of course that not the case anymore.

L. 439: "onto" seems the wrong word here to me. Perhaps use 'of' instead?

Fixed.

L. 460: Can omit "out".

Done.

L. 469: Following the sentence structure, I believe it should be 'maximally complex' instead of "maximum complexity".

I think so too. I changed the text.

## References

Sobolev, V. V. (2017). Light scattering in planetary atmospheres: international series of monographs in natural philosophy (Vol. 76). Elsevier.

Grant, R. H., Heisler, G. M., & Gao, W. (1996). Photosynthetically-active radiation: sky radiance distributions under clear and overcast conditions. *Agricultural and Forest Meteorology*, 82(1-4), 267- 292.

Nagata, T. (1997). Radiance distribution on stable overcast skies. *Journal of Light & Visual Environment*, 21(1).
